# Supplementary material for: Global gene profiling of aging lungs in Atp8b1 mutant mice
Source: publisher site journal article supplement (doi:10.18632/aging.101056), 2016-09-29
Supplement: Supplementary file 1 [file aging-v8i9-101056-supplementary-material-SD1.pdf]

**SUPPLEMENTARY MATERIAL**

**Table S1. Aging related overlapping genes in C57BL/6 lungs and *Atp8b1* mutant lungs.**

| Gene Symbol    | Fold change<br>( <i>Atp8b1</i> ) | Fold change<br>(C57BL/6) | FDR    |
|----------------|----------------------------------|--------------------------|--------|
| 2810047C21Rik1 | 1.006                            | 1.196                    | 0.0512 |
| AKAP13         | -1.388                           | -1.249                   | 0.0398 |
| C130026l21Rik  | 3.433                            | 2.945                    | 0.0512 |
| CDC73          | 1.203                            | 1.269                    | 0.0309 |
| COL1A1         | -1.924                           | -1.048                   | 0.0512 |
| COL3A1         | -1.213                           | -1.071                   | 0.0512 |
| CSPRS          | 2.086                            | 1.761                    | 0.0512 |
| CXCR6          | 1.742                            | 1.673                    | 0.0512 |
| DDX6           | -1.648                           | -1.819                   | 0.0512 |
| EIF4E3         | -1.153                           | -1.006                   | 0.0512 |
| EPB41L2        | -1.438                           | -1.364                   | 0.0512 |
| EPSTI1         | 1.268                            | 1.001                    | 0.0512 |
| IGHG3          | 2.406                            | 1.642                    | 0.0512 |
| IGHG           | 6.381                            | 4.305                    | 0.0512 |
| IGHM           | 4.456                            | 1.108                    | 0.0512 |
| LOC664787      | 1.352                            | 1.676                    | 0.0512 |
| LUZP1          | -1.292                           | -1.228                   | 0.0512 |
| MALAT1         | -1.241                           | -1.062                   | 0.0512 |
| PEG3           | -1.772                           | -1.109                   | 0.0512 |
| PPBP           | 1.916                            | 1.273                    | 0.0903 |
| PRG2           | 2.338                            | 1.845                    | 0.0903 |
| PRRC2C         | -1.596                           | -1.184                   | 0.0512 |
| RAPGEF6        | -1.178                           | -1.003                   | 0.0903 |
| RBM5           | -1.509                           | -1.015                   | 0.0512 |
| RIAN           | -1.317                           | -1.405                   | 0.0512 |
| SEMA5A         | -1.316                           | -1.237                   | 0.0512 |
| SF3B1          | -1.117                           | -1.059                   | 0.0512 |
| SLC6A20        | 1.868                            | 1.117                    | 0.0512 |
| SRRM2          | -1.162                           | -1.014                   | 0.0512 |
| TRA2B          | -1.48                            | -1.122                   | 0.0512 |

**Table S2. Other canonical pathways identified in aged C57BL/6 lungs.**

| <u>Name</u>                     | <u>Molecules</u> | <u>-log(p-value)</u> |
|---------------------------------|------------------|----------------------|
| RhoA Signaling                  | RAPGEF6,DLC1     | 7.86E-01             |
| PI3K/AKT Signaling              | JAK1,PPP2R2C     | 7.75E-01             |
| Oncostatin M Signaling          | JAK1             | 7.28E-01             |
| iNOS Signaling                  | JAK1             | 6.26E-01             |
| Wnt/ $\beta$ -catenin Signaling | WIF1, PPP2R2C    | 5.71E-01             |
| EGF Signaling                   | JAK1             | 5.35E-01             |
| JAK/Stat Signaling              | JAK1             | 4.44E-01             |
| PDGF Signaling                  | JAK1             | 4.21E-01             |

**Table S3. Other canonical pathways identified in aged *Atp8b1* mutant lungs.**

| <u>Name</u>                                              | <u>Molecules</u>                                                       | <u>-log(p-value)</u> |
|----------------------------------------------------------|------------------------------------------------------------------------|----------------------|
| RhoA Signaling                                           | RAPGEF6,PPP1R12A,MYL3,TTN,IGF1,RHOA                                    | 1.37E00              |
| Oxidized GTP and dGTP Detoxification                     | DDX6                                                                   | 1.19E00              |
| Ephrin A Signaling                                       | PIK3CD,PTPN11,RHOA                                                     | 1.1E00               |
| Clathrin-mediated Endocytosis Signaling                  | APOC2,PIK3CD,UBD,SERPINA1,IGF1,VEGFC,EPS15                             | 1.09E00              |
| Protein Ubiquitination Pathway                           | UBE3A,USP36,DNAJC3,HLA-A,USP8,USP2,UBD,B2M,PSMB8                       | 1.07E00              |
| Retinol Biosynthesis                                     | LRAT,LIPC                                                              | 9.57E-01             |
| Actin Cytoskeleton Signaling                             | PIK3CD,PPP1R12A,GSN,MYL3,RAC2,TTN,RHOA                                 | 7.99E-01             |
| Protein Kinase A Signaling                               | AKAP13,PPP1R12A,PTPN11,DUSP18,MYL3,PRKCB,CREBBP,PTPN22,NFKBIE,TTN,RHOA | 7.95E-01             |
| Superoxide Radicals Degradation                          | NQO1                                                                   | 7.89E-01             |
| Rac Signaling                                            | PIK3CD,SH3RF1,CYBB,RHOA                                                | 7.63E-01             |
| CXCR4 Signaling                                          | RHOH,PIK3CD,MYL3,PRKCB,RHOA                                            | 6.48E-01             |
| PDGF Signaling                                           | PIK3CD,STAT1,PRKCB                                                     | 6.34E-01             |
| Integrin Signaling                                       | RHOH,PIK3CD,PPP1R12A,RAC2,TTN,RHOA                                     | 6.29E-01             |
| NF- $\kappa$ B Signaling                                 | TNFRSF17,PIK3CD,PRKCB,CREBBP,NFKBIE                                    | 5.62E-01             |
| TNFR1 Signaling                                          | NAIP,NFKBIE                                                            | 5.6E-01              |
| Calcium Signaling                                        | ATP2B2,SLC8A1,MYL3,CREBBP,ATP2B1                                       | 5.3E-01              |
| Death Receptor Signaling                                 | NAIP,TNFSF10,NFKBIE                                                    | 5.26E-01             |
| Apoptosis Signaling                                      | NAIP,BCL2A1,NFKBIE                                                     | 5.26E-01             |
| RhoGDI Signaling                                         | RHOH,PPP1R12A,MYL3,CREBBP,RHOA                                         | 5.23E-01             |
| Glutathione Redox Reactions                              | PRDX6                                                                  | 5.03E-01             |
| Unfolded protein response                                | EDEM1,DNAJC3                                                           | 5E-01                |
| Ephrin Receptor Signaling                                | PTPN11,CREBBP,RAC2,VEGFC,RHOA                                          | 4.99E-01             |
| mTOR Signaling                                           | RHOH,PIK3CD,PRKCB,VEGFC,RHOA                                           | 4.76E-01             |
| Wnt/Ca <sup>+</sup> pathway                              | WNT5A,CREBBP                                                           | 4.68E-01             |
| EGF Signaling                                            | PIK3CD,STAT1                                                           | 4.68E-01             |
| Myc Mediated Apoptosis Signaling                         | PIK3CD,IGF1                                                            | 4.48E-01             |
| DNA Methylation and Transcriptional Repression Signaling | DNMT3A                                                                 | 4.46E-01             |
| Endoplasmic Reticulum Stress Pathway                     | DNAJC3                                                                 | 4.46E-01             |
| Signaling by Rho Family GTPases                          | RHOH,PIK3CD,PPP1R12A,MYL3,CYBB,RHOA                                    | 4.39E-01             |
| Xenobiotic Metabolism Signaling                          | PIK3CD,PRKCB,IL4I1,CREBBP,UGT8,NQO1                                    | 3.99E-01             |
| Sonic Hedgehog Signaling                                 | HHIP                                                                   | 3.46E-01             |
| SAPK/JNK Signaling                                       | PIK3CD,RAC2                                                            | 2.53E-01             |
| TGF- $\beta$ Signaling                                   | RUNX3,CREBBP                                                           | 2.53E-01             |
